# Supplementary material for: π-Complexes from acyl cyanides and lithium dimethylcuprate(i)
Source: Royal Society of Chemistry journal article supplement (doi:10.1039/c3cc40602d), 2013-01-01

Cite this: DOI: 10.1039/c0xx00000x

www.rsc.org/xxxxxx

**ARTICLE TYPE**

---

## **$\pi$ -Complexes from acyl cyanides and lithium dimethylcuprate(I)**

**Steven H. Bertz,\*<sup>a</sup> Richard A. Hardin,<sup>a</sup> Michael D. Murphy<sup>a</sup> and Craig A. Ogle\*<sup>a</sup>**

**Electronic Supplementary Information**

## Pyruvonitrile / $\text{Me}_2\text{CuLi}\cdot\text{LiI}$ $\pi$ -Complex

$^1\text{H}$  NMR ( $-100\text{ }^\circ\text{C}$ )

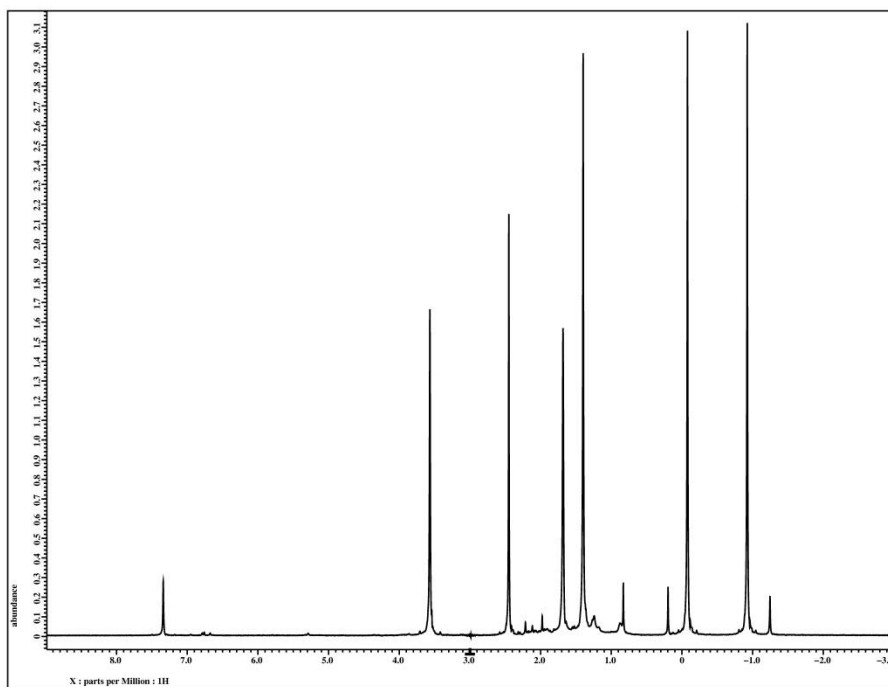

## Pyruvonitrile / $\text{Me}_2\text{CuLi}\cdot\text{LiI}$ $\pi$ -Complex

$^{13}\text{C}$  NMR ( $-100\text{ }^\circ\text{C}$ )

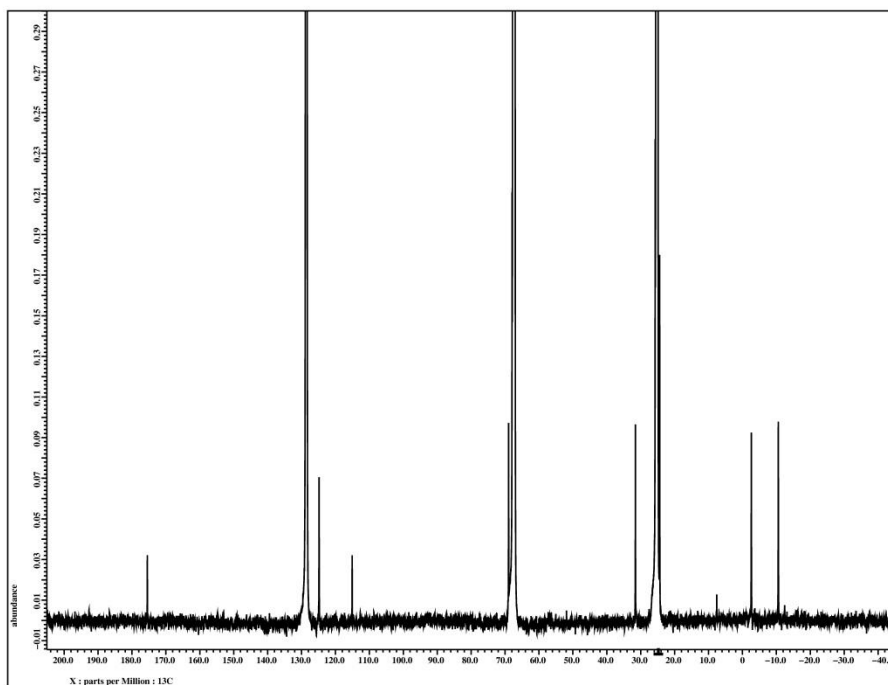

Pyruvonitrile /  $\text{Me}_2\text{CuLi}\cdot\text{LiI}$   $\pi$ -Complex

HMQC ( $-100^\circ\text{C}$ )

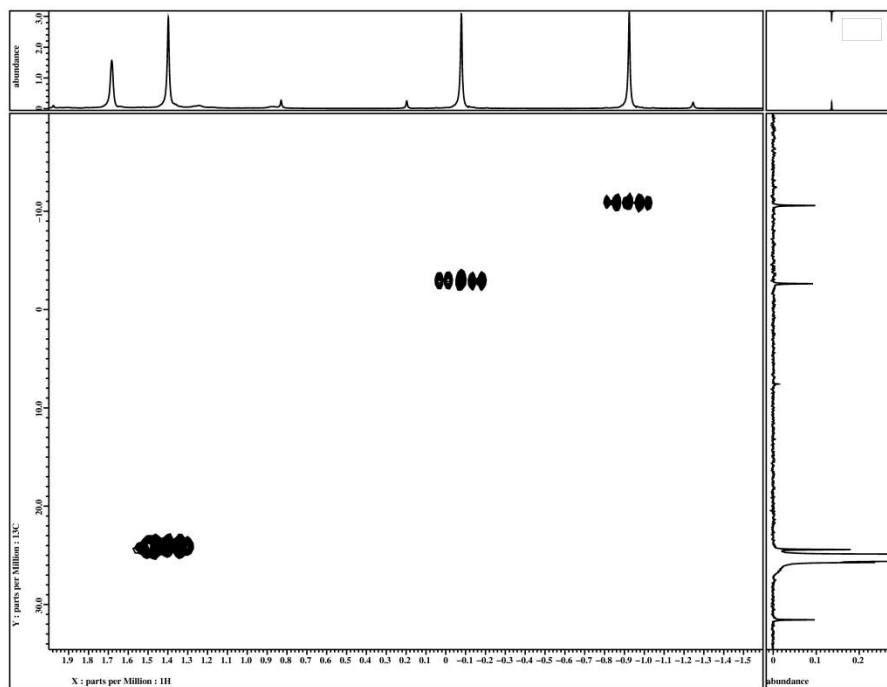

Pyruvonitrile /  $\text{Me}_2\text{CuLi}\cdot\text{LiI}$   $\pi$ -Complex

HMBC ( $-100^\circ\text{C}$ )

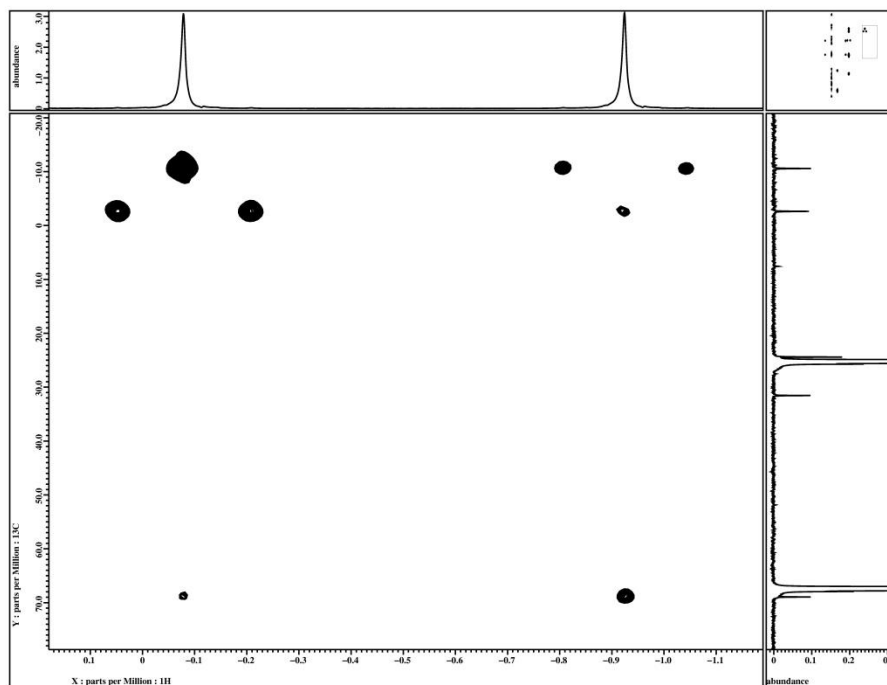

Pyruvonitrile /  $\text{Me}_2\text{CuLi}\cdot\text{LiI}$   $\pi$ -Complex

HMBC ( $-100^\circ\text{C}$ )

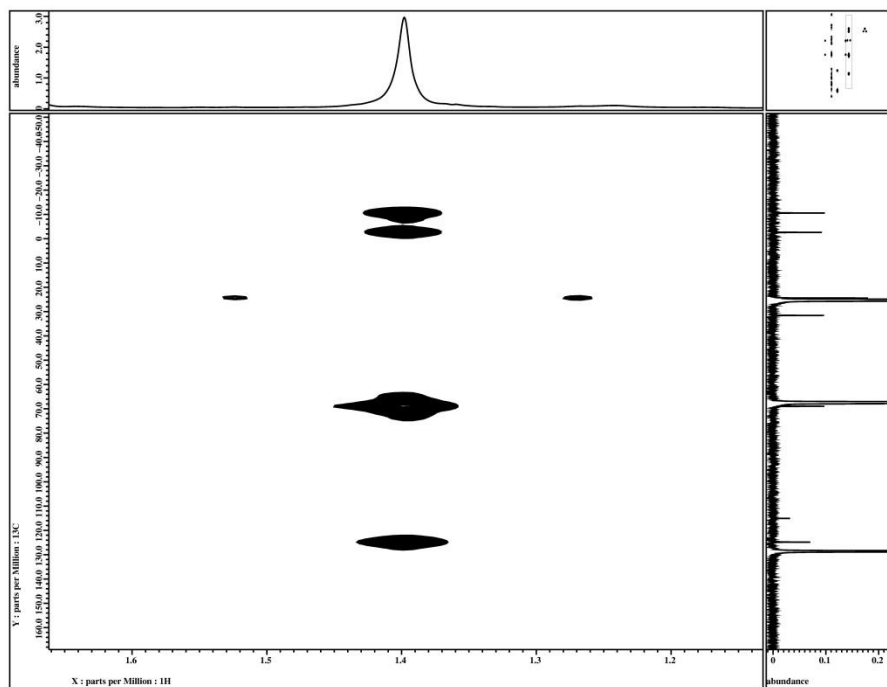

Pyruvonitrile /  $\text{Me}_2\text{CuLi}\cdot\text{LiI}$   $\pi$ -Complex

1-D NOE (irradiation offset = 1.40 ppm) ( $-100^\circ\text{C}$ )

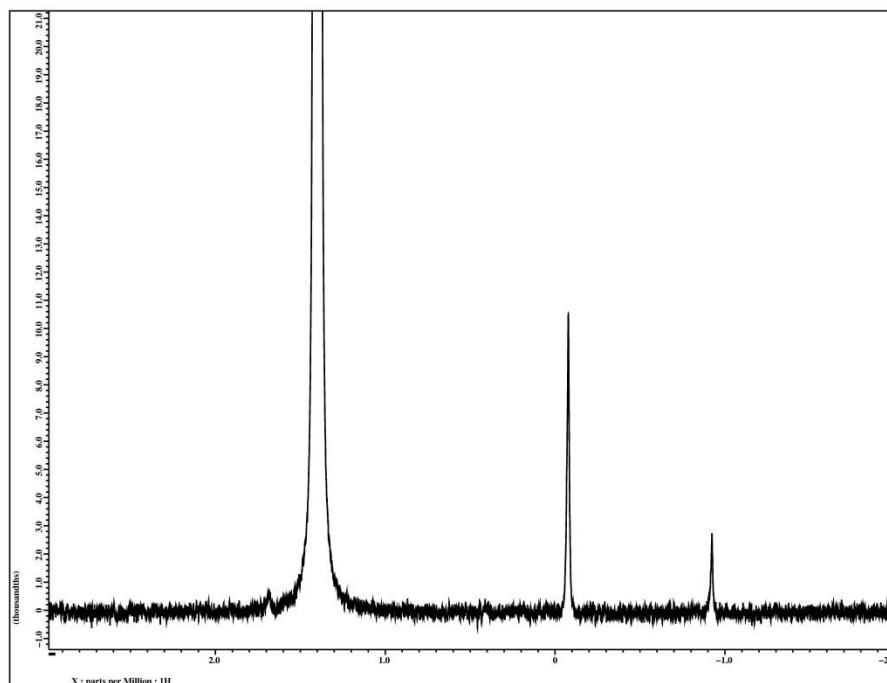

### Benzoyl cyanide / $\text{Me}_2\text{CuLi}\cdot\text{LiI}$ $\pi$ -Complex

$^1\text{H}$  NMR ( $-100\text{ }^\circ\text{C}$ )

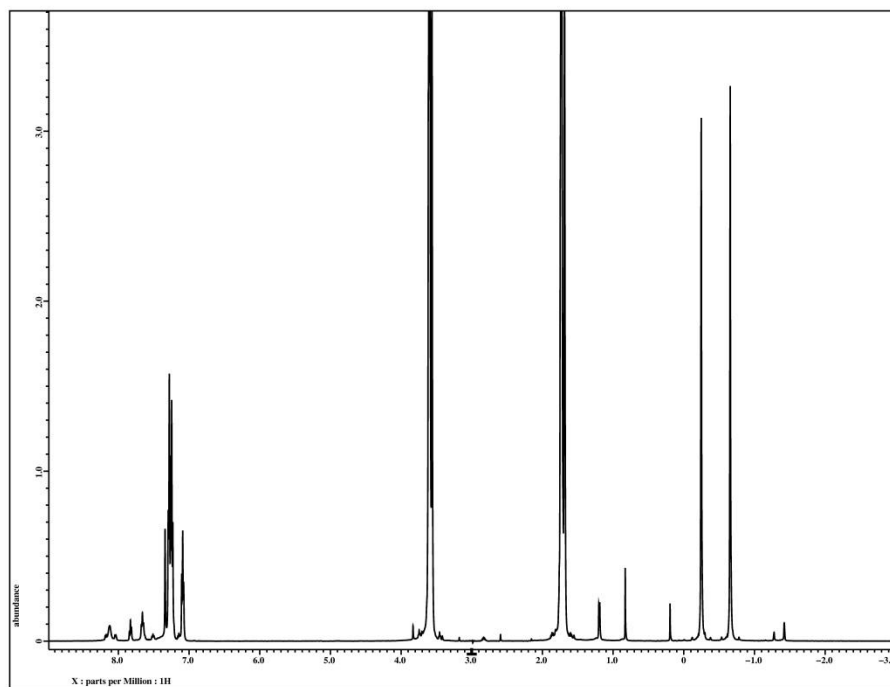

### Benzoyl cyanide / $\text{Me}_2\text{CuLi}\cdot\text{LiI}$ $\pi$ -Complex

$^{13}\text{C}$  NMR ( $-100\text{ }^\circ\text{C}$ )

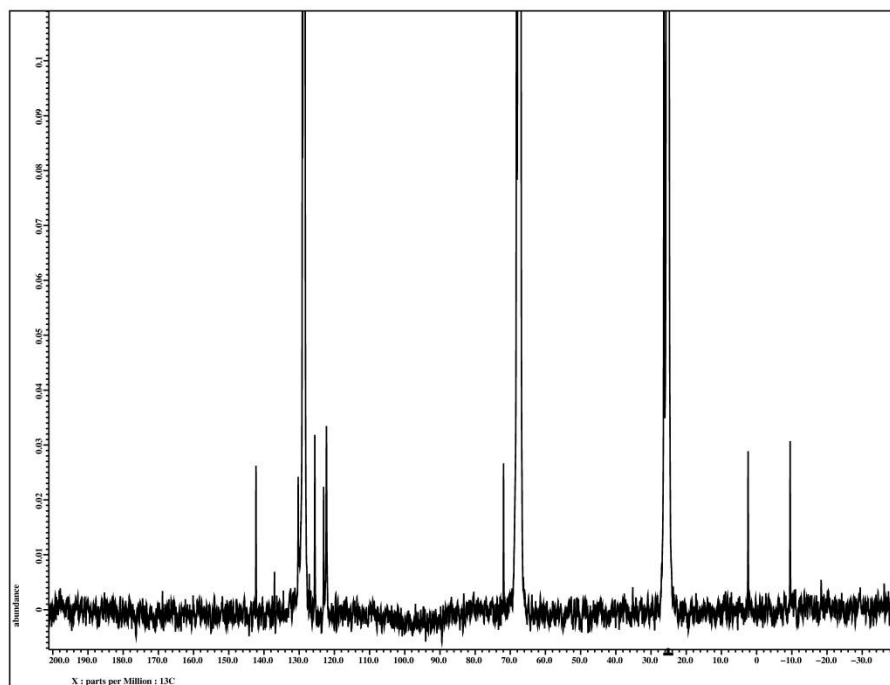

Benzoyl cyanide /  $\text{Me}_2\text{CuLi}\cdot\text{LiI}$   $\pi$ -Complex

HMQC ( $-100^\circ\text{C}$ )

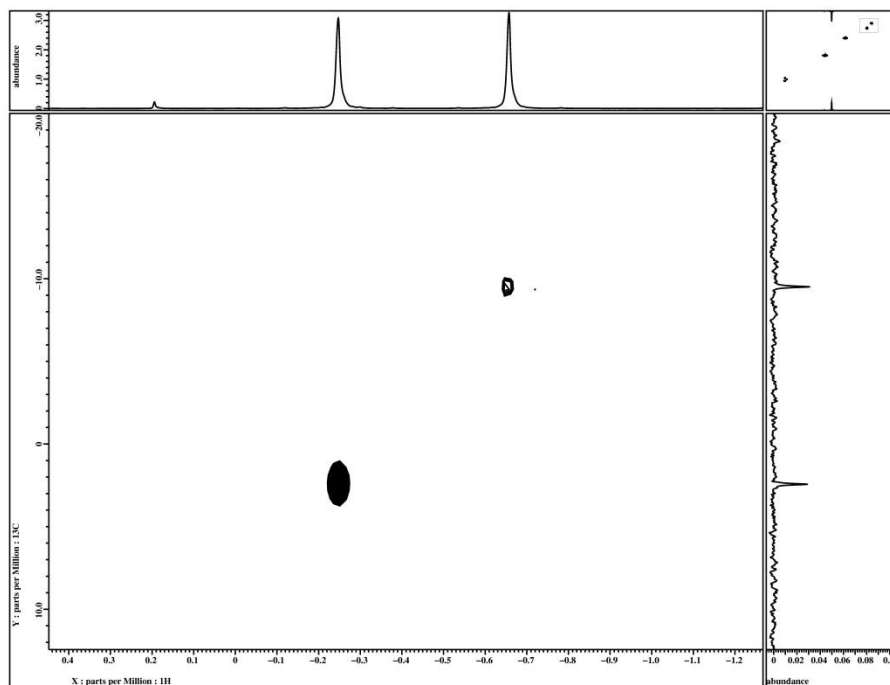

Benzoyl cyanide /  $\text{Me}_2\text{CuLi}\cdot\text{LiI}$   $\pi$ -Complex

HMBC ( $-100^\circ\text{C}$ )

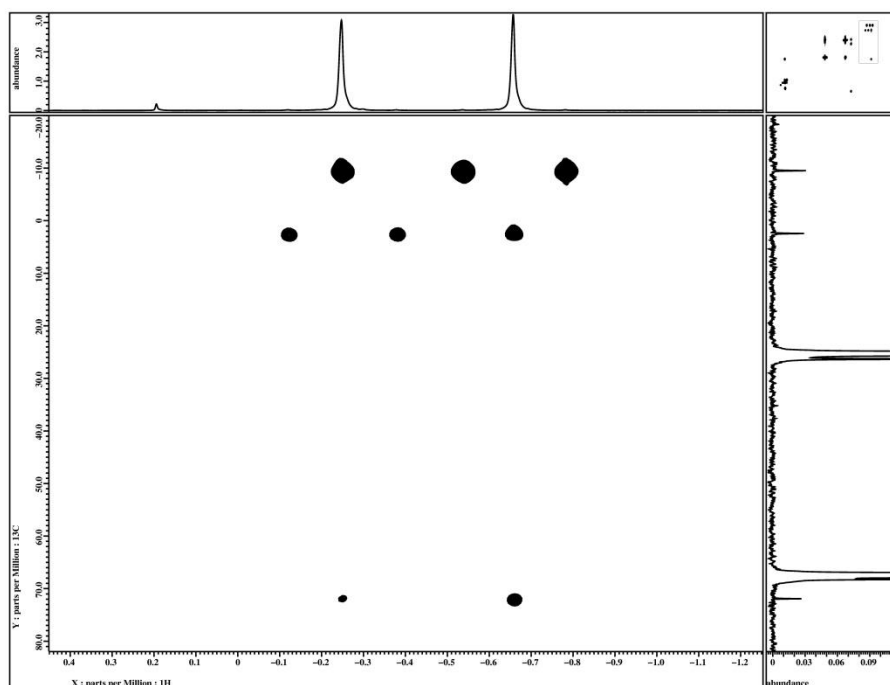

# Benzoyl cyanide / $\text{Me}_2\text{CuLi}\cdot\text{LiI}$ $\pi$ -Complex

HMBC ( $-100^\circ\text{C}$ )

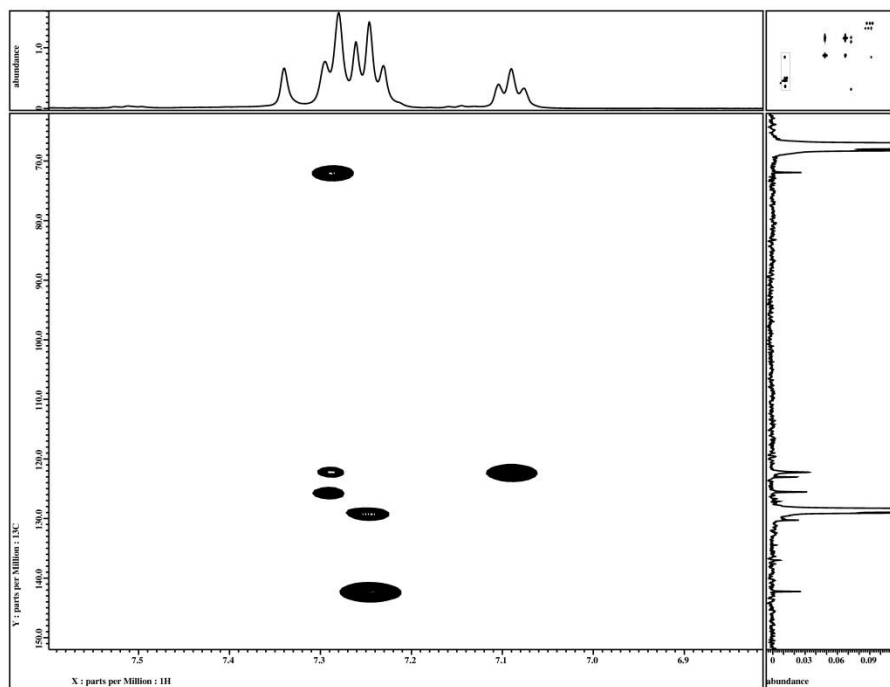

### Study of the benzoyl cyanide / $\text{Me}_2\text{CuLi}\cdot\text{LiI}$ $\pi$ -complex using isotopic labelling.

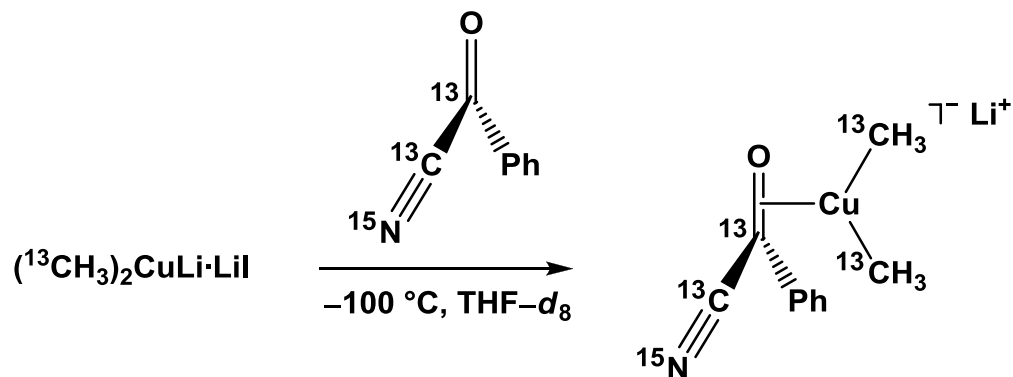

### References

1. Preparation of  $\text{CuCN}$ : Reid, J.C.; Weaver, J.C. *Cancer Research* **1951**, *11*, 188-194.
2. Preparation of benzoyl cyanide: Oakwood, T.S.; Weisgerber, C.A. *Org. Synth.* **1944**, *24*, 14-16.

Note that in the titles below the number of stars (\*) refers to the number of labeled atoms.



\*\*\*Benzoyl cyanide (Substrate Only)

$^{13}\text{C}$  (carbonyl carbon) ( $-100\text{ }^\circ\text{C}$ )

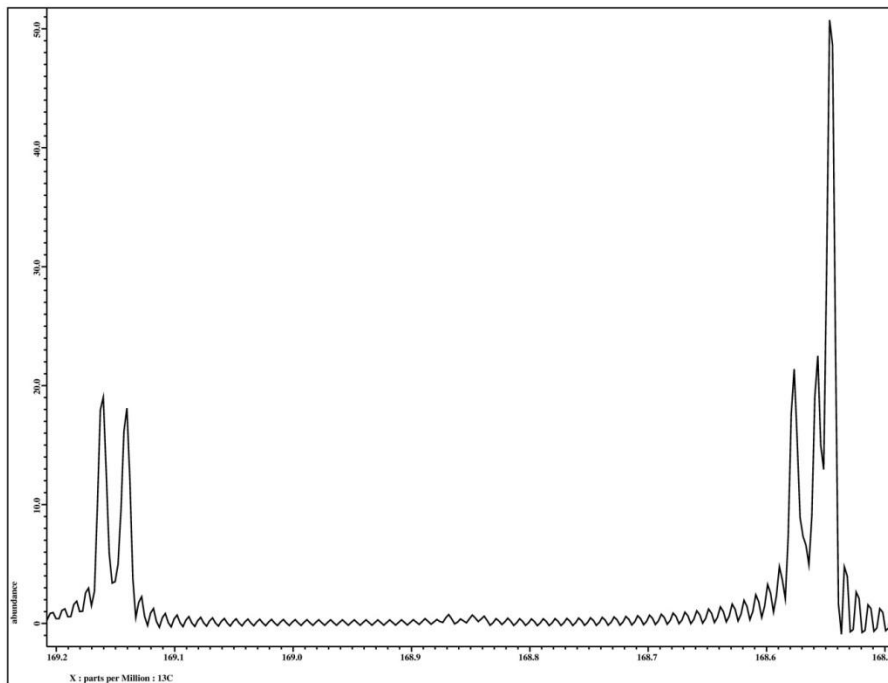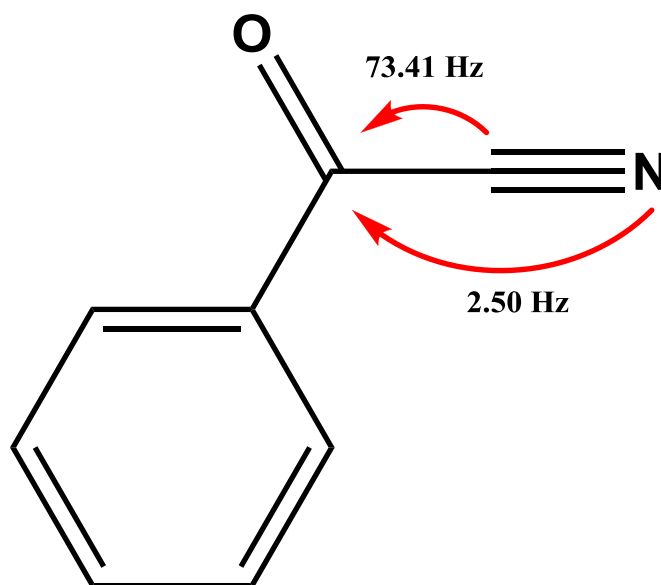

\*\*\*Benzoyl cyanide (Substrate Only)

$^{13}\text{C}$  (cyano carbon) ( $-100\text{ }^\circ\text{C}$ )

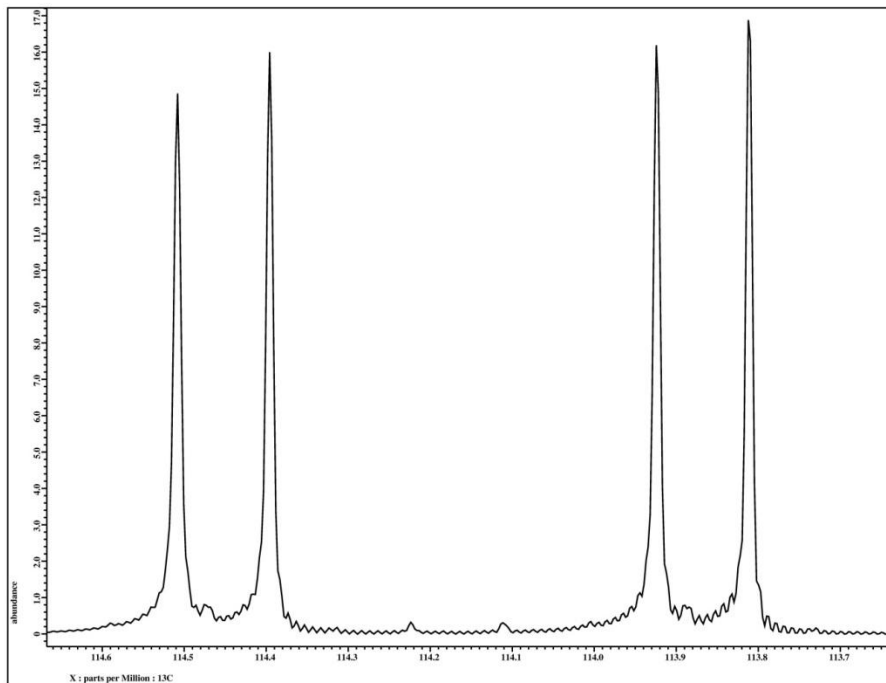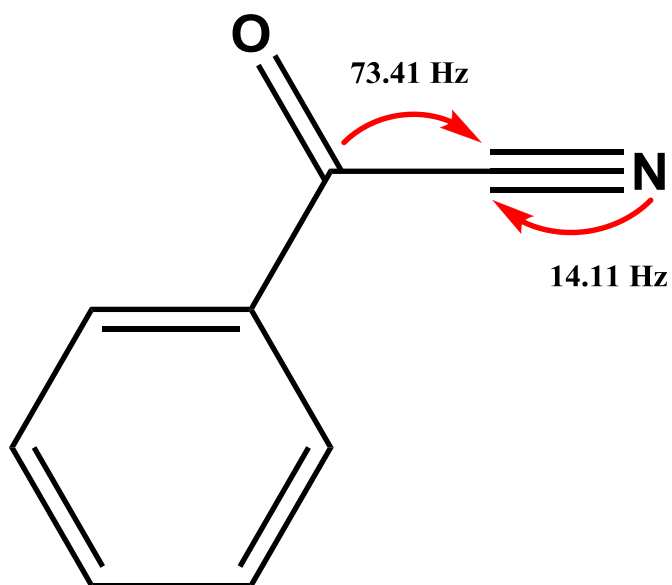

\*\*\*Benzoyl cyanide (Substrate Only)

$^{15}\text{N}$  (cyano nitrogen) ( $-100\text{ }^\circ\text{C}$ )

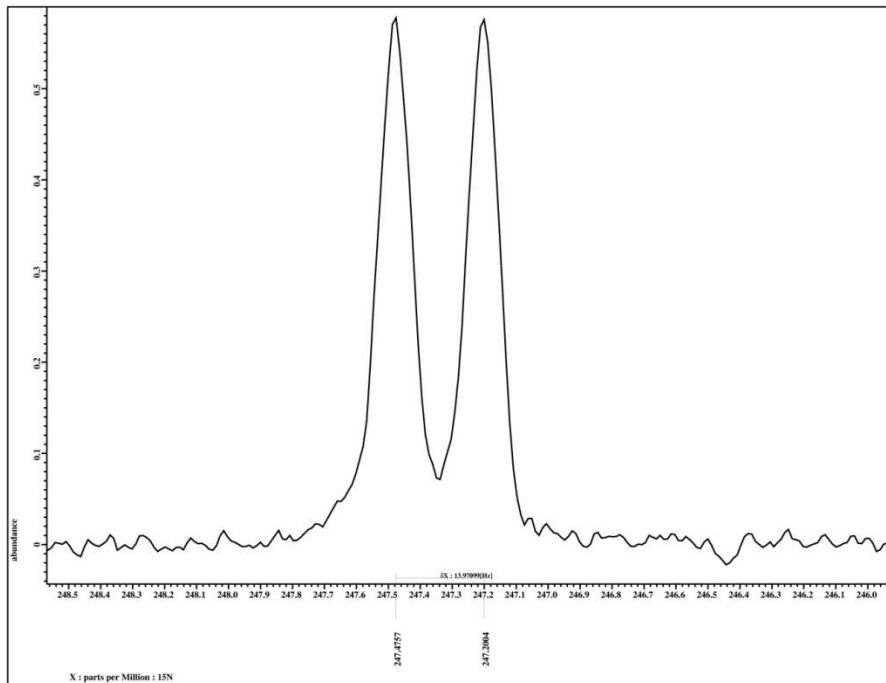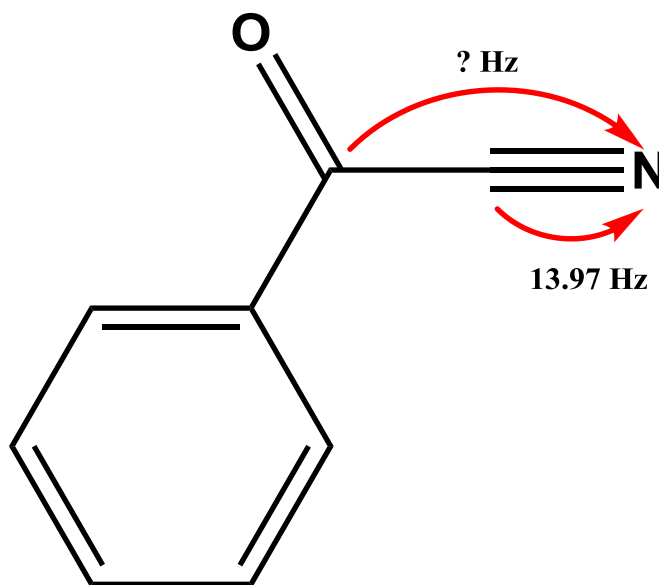

\*\*\*Benzoyl cyanide / \*\*Me<sub>2</sub>CuLi·LiI π-Complex

<sup>13</sup>C (carbonyl carbon) (−100 °C)

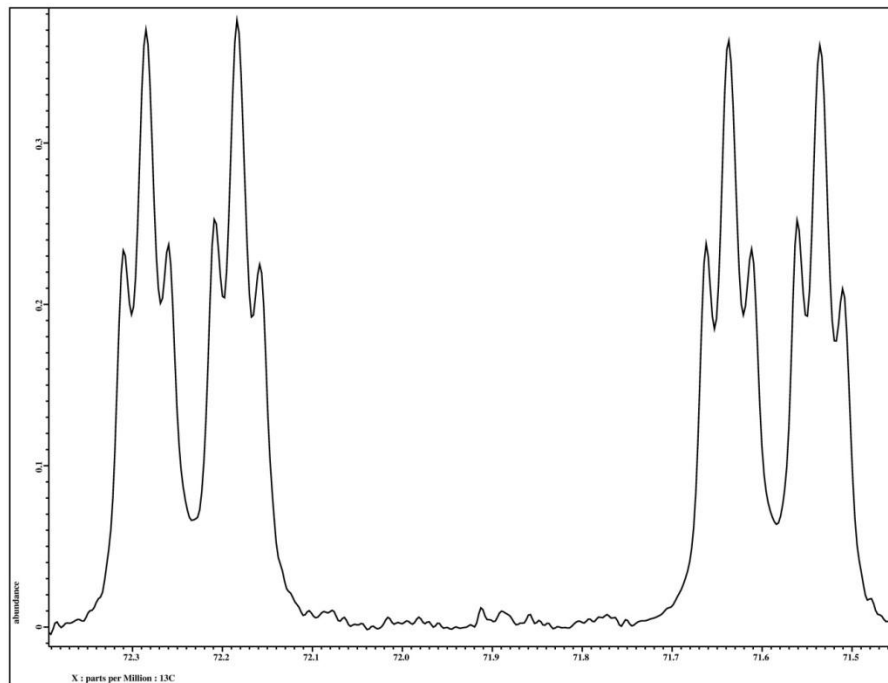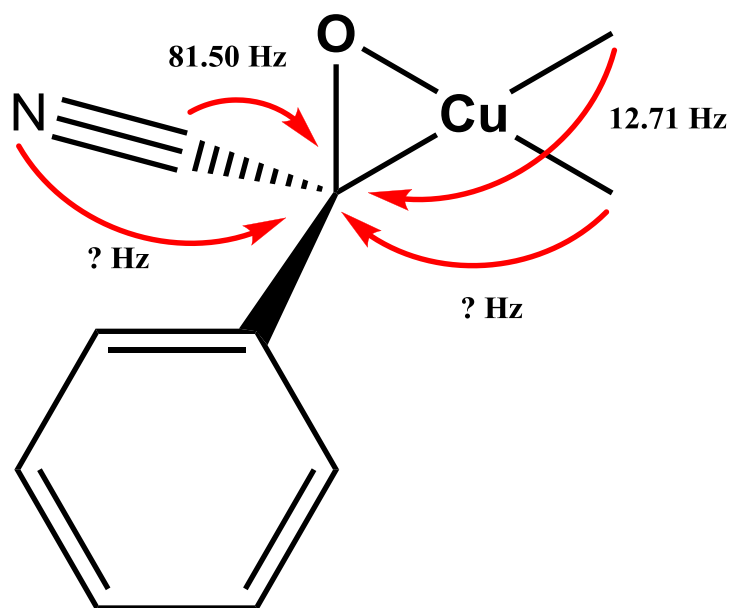

\*\*\*Benzoyl cyanide / \*\*Me<sub>2</sub>CuLi·LiI π-Complex

<sup>13</sup>C (cyano carbon) (−100 °C)

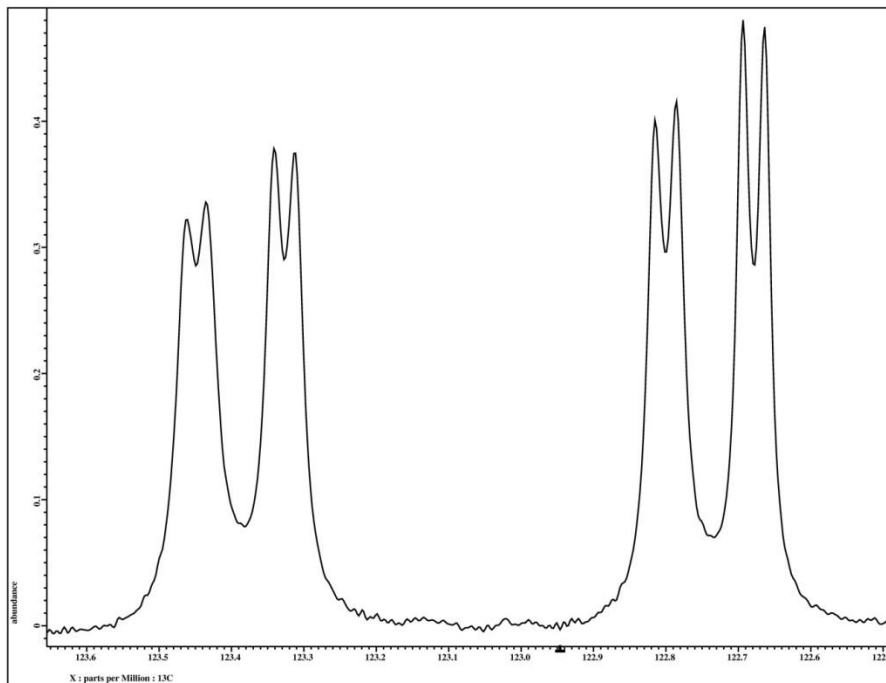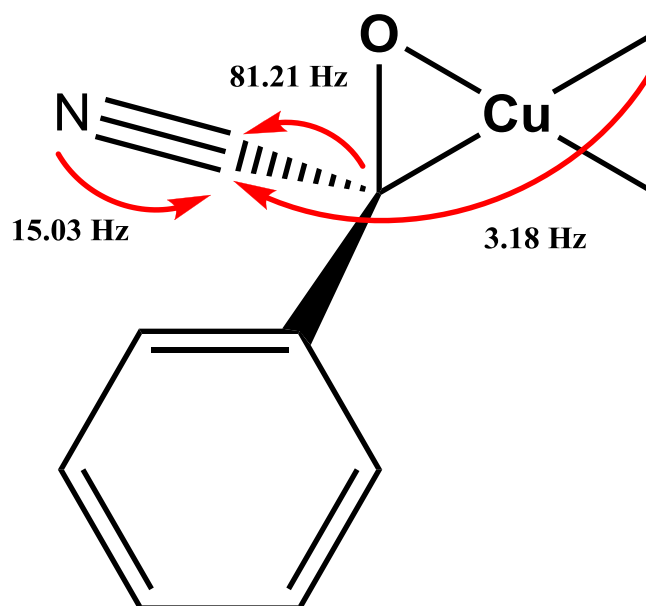

\*\*\*Benzoyl cyanide / \*\*Me<sub>2</sub>CuLi·LiI π-Complex

<sup>15</sup>N (cyano nitrogen) (-100 °C)

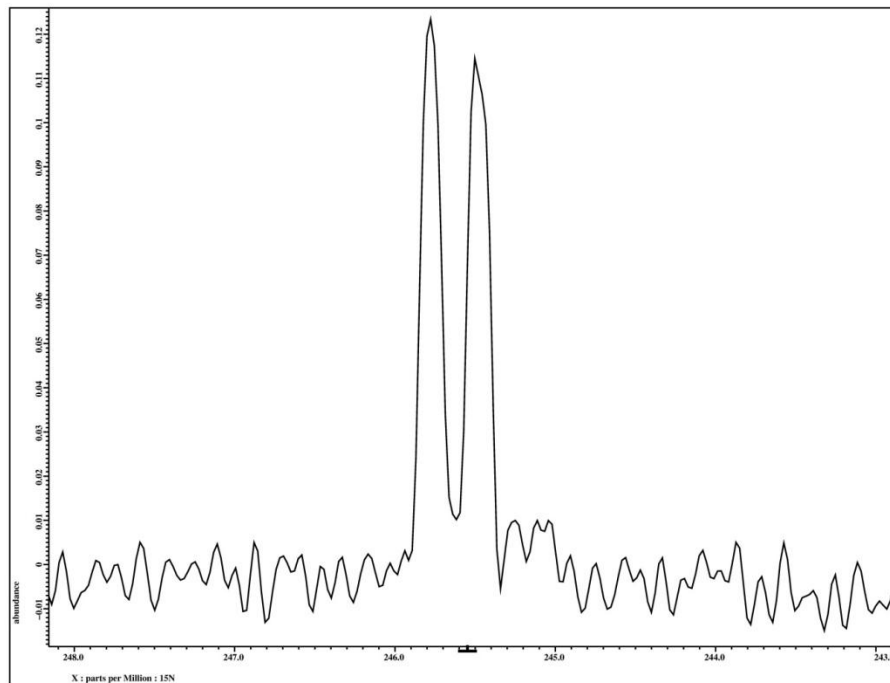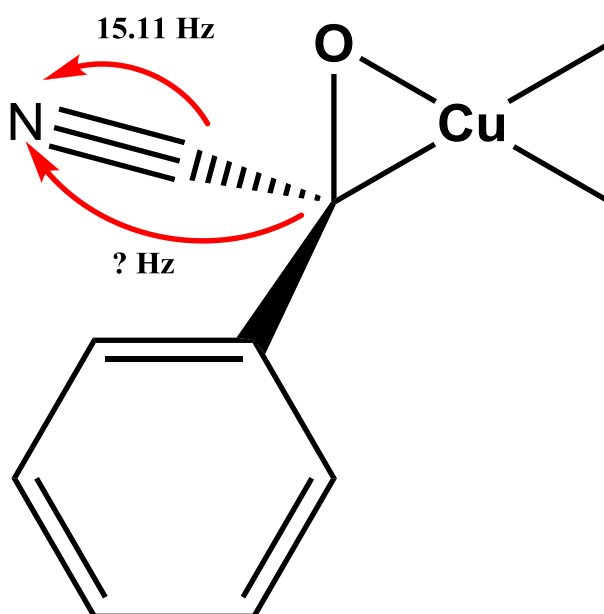

\*\*\*Benzoyl cyanide / \*\*Me<sub>2</sub>CuLi·LiI π-Complex

<sup>13</sup>C (CuMe *cis* to carbonyl C) (-100 °C)

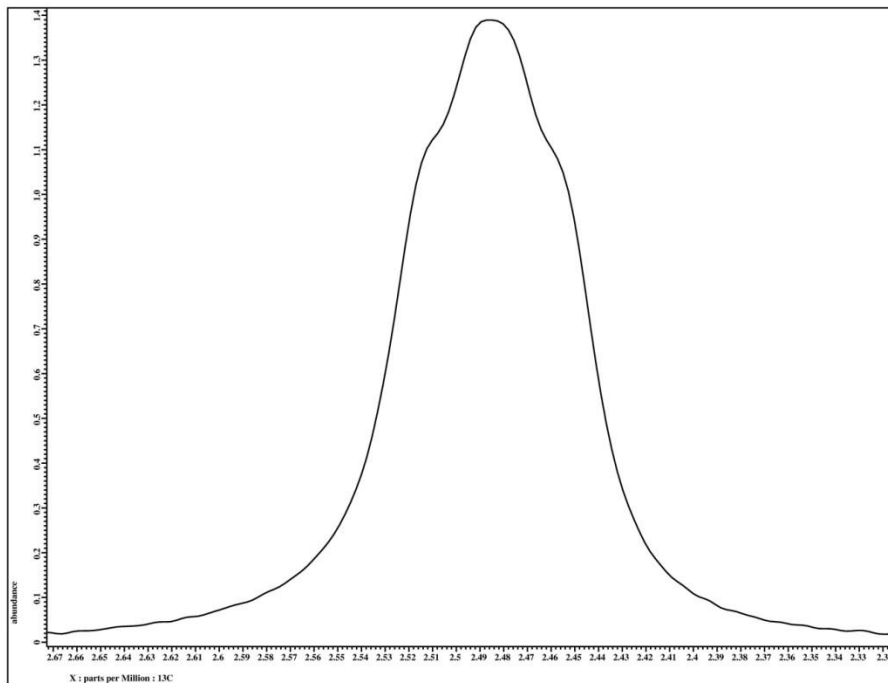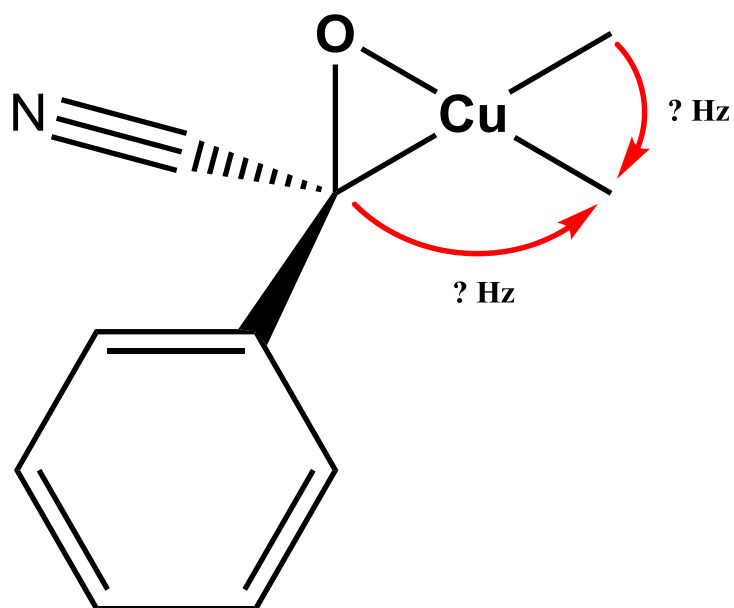

\*\*\*Benzoyl cyanide / \*\*Me<sub>2</sub>CuLi·LiI π-Complex

<sup>13</sup>C (CuMe *trans* to carbonyl C) (-100 °C)

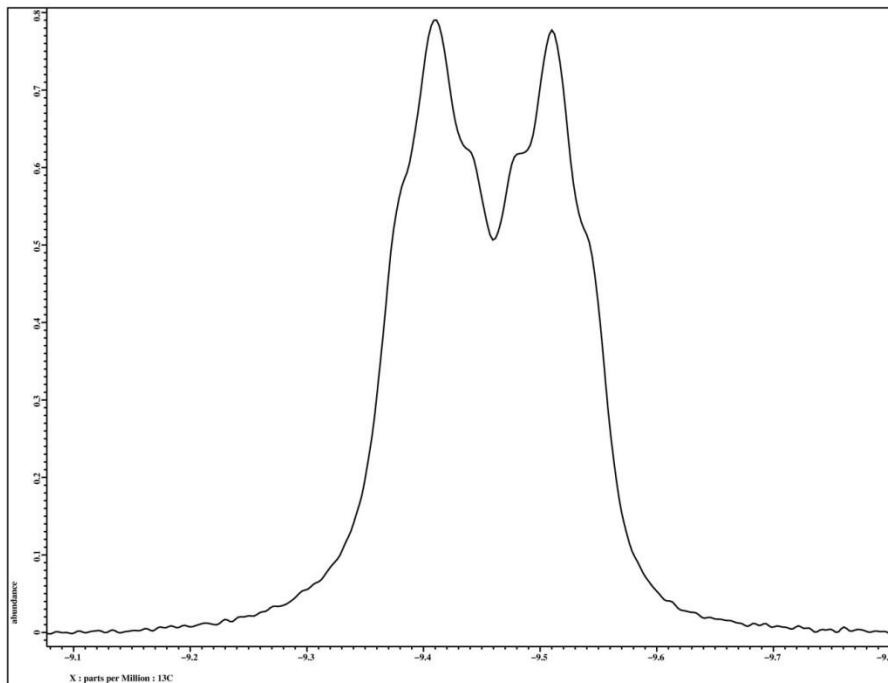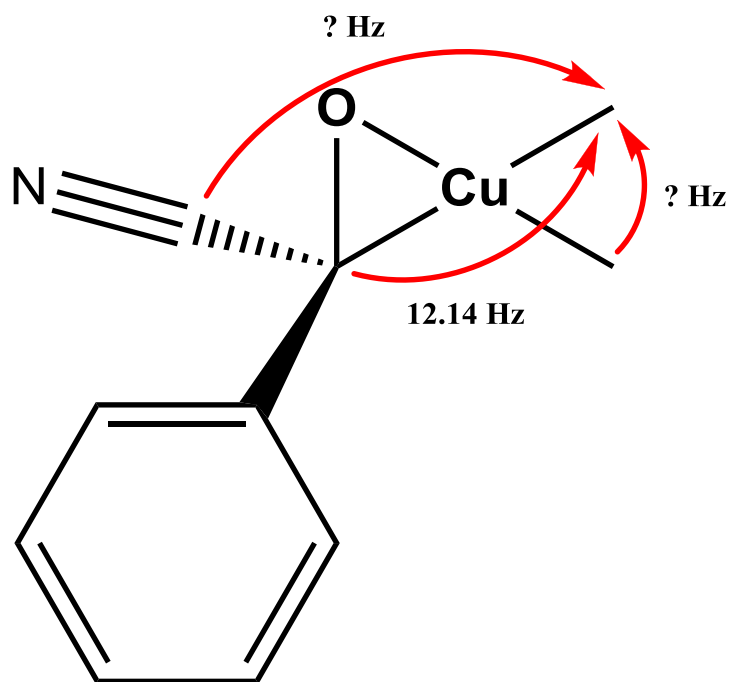

Supplement: c3cc40602d.pdf [file c3cc40602d.pdf]
